# Supplementary material for: Polymerase delta-interacting protein 2 deficiency protects against blood-brain barrier permeability in the ischemic brain
Source: Springer Nature journal article supplement (doi:10.1186/s12974-017-1032-1), 2018-02-17

## Additional file 5: Figure S4

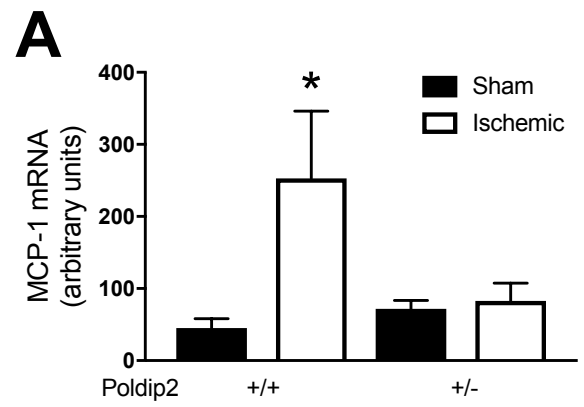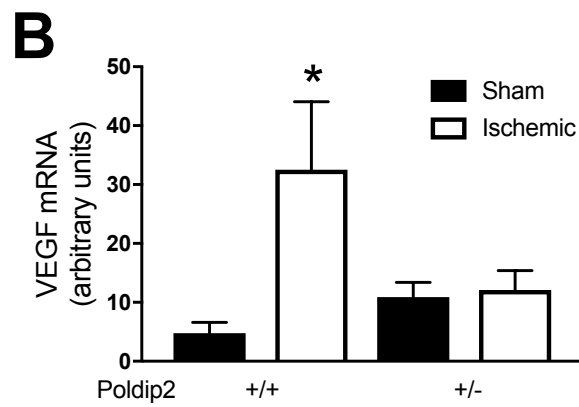

Supplement: MOESM5 [file 15472816]
